# Supplementary material for: Directing the growth of ZnO nano structures on flexible substrates using low temperature aqueous synthesis
Source: Royal Society of Chemistry journal article supplement (doi:10.1039/c5ra15453g), 2015-01-01
Supplement: c5ra15453g1.pdf [file c5ra15453g1.pdf]

## Electronic Supplementary Information

### Directing the Growth of ZnO Nano Structures on Flexible Substrates Using Low Temperature Aqueous Synthesis

Santhosh S. Nair,<sup>a</sup> John Forsyth,<sup>a</sup> and Bjorn Winther-Jensen<sup>a</sup>

Effect of plasma treatment on ZnO NWs grown on PES substrates

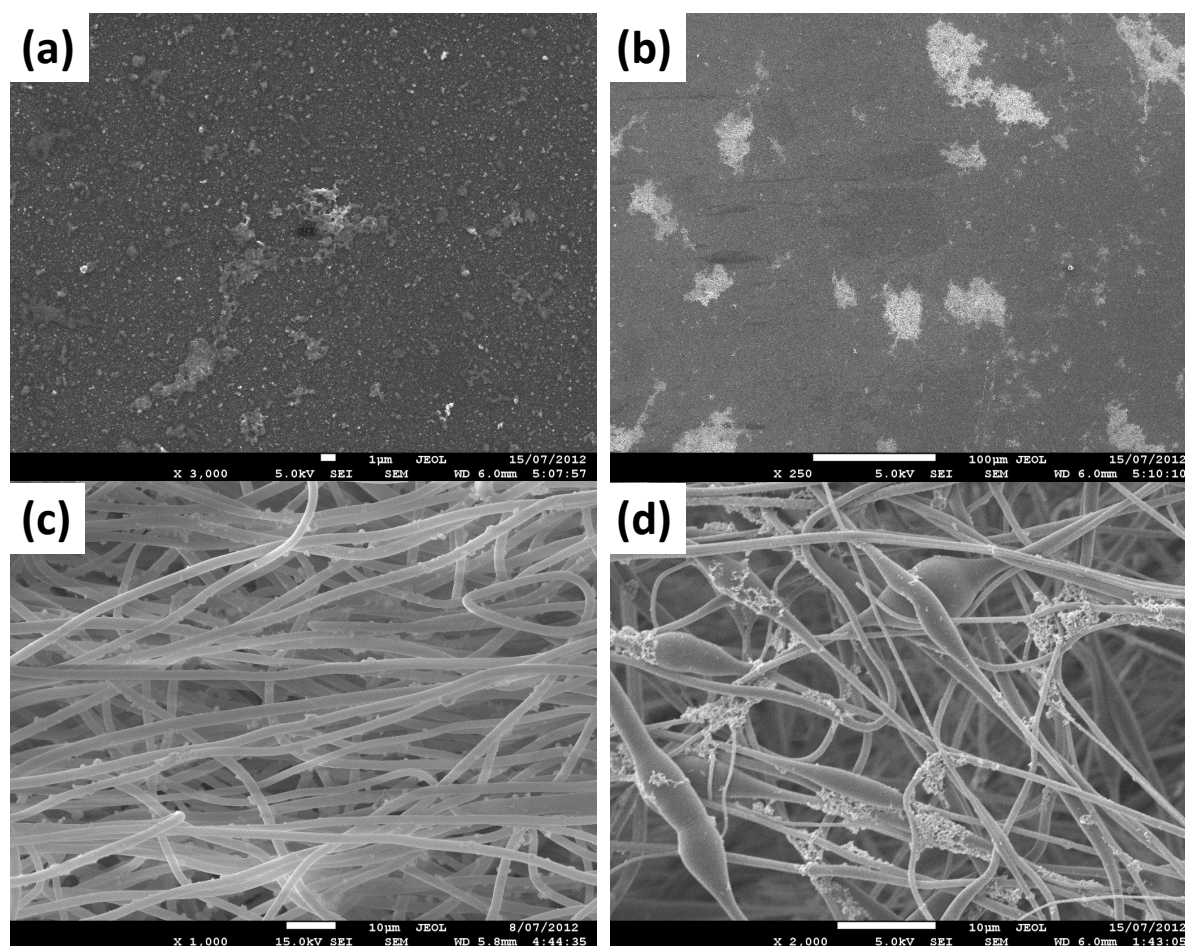

**Fig S1** (a) five seed layer deposited on 2-D PES (b) five seed layer deposited on plasma treated 2-D PES. (c) One seed layer deposited on 3-D PES (d) One seed layer deposited on plasma treated 3-D PES.

### Nanowalls water oxidation behaviour

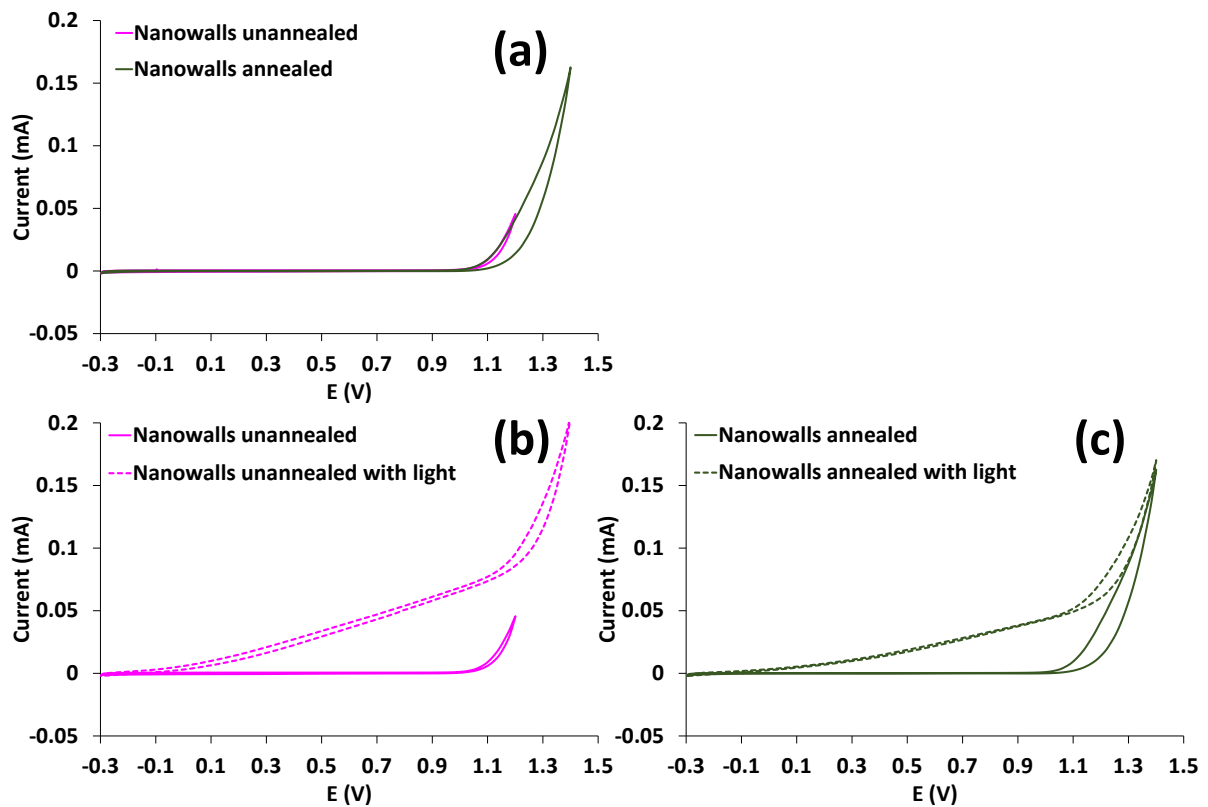

**Fig S2** Water oxidation behaviour in 0.01 M KOH of the nanowalls produced using APS treatment route (Fig 5) (a) unannealed and annealed (b) unannealed with and without light (c) annealed with and without light.

### XRD of the Nanowires on PES

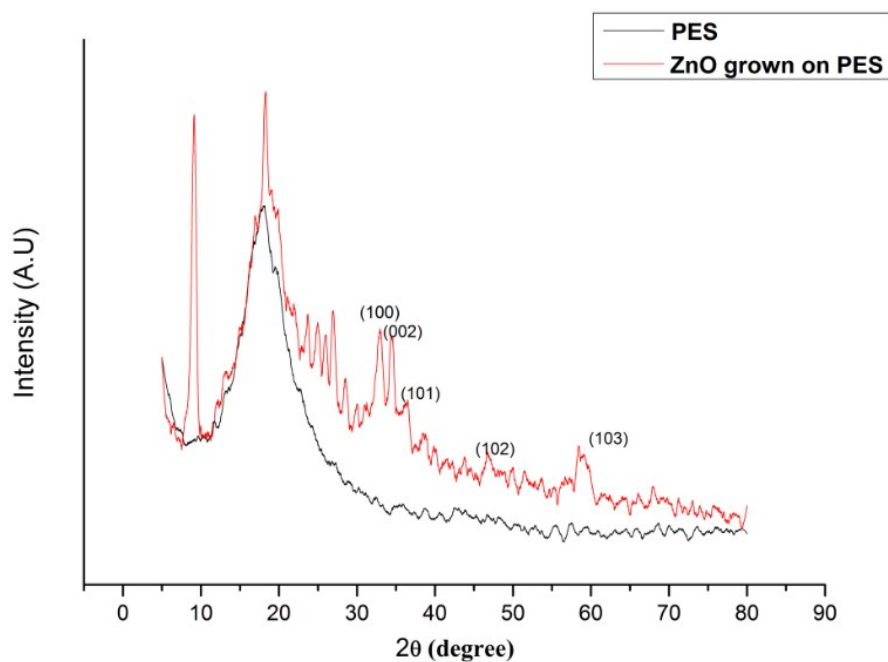

**Fig S3** XRD of ZnO NWs on PES foil compared with XRD of the bare PES.
